# Supplementary material for: Evaluation of psychometric properties of the German Hospital Survey on Patient Safety Culture and its potential for cross-cultural comparisons: a cross-sectional study
Source: PubMed Central journal article supplement — BMJ Open. 2017 Nov 9;7(11):e018366. doi: 10.1136/bmjopen-2017-018366 (PMC5695411; doi:10.1136/bmjopen-2017-018366), 2017-11-09
Supplement: bmjopen-2017-018366supp001.pdf [file bmjopen-2017-018366supp001.pdf]

# Appendix 1

Pearson's correlations between single item outcome variables (*Patient safety grade (E1)* and *Number of events reported (G1)*) and HSPSC dimensions in two factor models.

| <b>A. Original 12-factor model</b>                                 |                 |               |                 | 01     | 02     | 03     | 04     | 05     | 06     | 07     | 08     | 09     | 10     | 11     |
|--------------------------------------------------------------------|-----------------|---------------|-----------------|--------|--------|--------|--------|--------|--------|--------|--------|--------|--------|--------|
|                                                                    | Number of items | E1            | G1 <sup>+</sup> |        |        |        |        |        |        |        |        |        |        |        |
| E1. Patient Safety Grade                                           | 1               |               |                 |        |        |        |        |        |        |        |        |        |        |        |
| G1: Number of Events Reported                                      | 1               | <b>-0,04</b>  |                 |        |        |        |        |        |        |        |        |        |        |        |
| 01. Teamwork within units                                          | 4               | <b>0,32**</b> | <b>0,08*</b>    |        |        |        |        |        |        |        |        |        |        |        |
| 02. Organizational learning                                        | 3               | <b>0,48**</b> | <b>0,02</b>     | 0,45** |        |        |        |        |        |        |        |        |        |        |
| 03. Nonpunitive response to error                                  | 3               | <b>0,41**</b> | <b>-0,05</b>    | 0,32** | 0,38** |        |        |        |        |        |        |        |        |        |
| 04. Staffing                                                       | 4               | <b>0,46**</b> | <b>-0,08*</b>   | 0,26** | 0,30** | 0,42** |        |        |        |        |        |        |        |        |
| 05. Overall perceptions of safety                                  | 4               | <b>0,70**</b> | <b>-0,06*</b>   | 0,37** | 0,57** | 0,46** | 0,61** |        |        |        |        |        |        |        |
| 06. Supervisor/manager expectations/actions                        | 4               | <b>0,41**</b> | <b>0,00</b>     | 0,35** | 0,47** | 0,38** | 0,32** | 0,44** |        |        |        |        |        |        |
| 07. Frequency of event reporting                                   | 3               | <b>0,34**</b> | <b>0,14**</b>   | 0,22** | 0,39** | 0,18** | 0,14** | 0,34** | 0,28** |        |        |        |        |        |
| 08. Feedback and communication about error                         | 3               | <b>0,43**</b> | <b>0,01</b>     | 0,40** | 0,61** | 0,32** | 0,22** | 0,44** | 0,50** | 0,50** |        |        |        |        |
| 09. Communication openness                                         | 3               | <b>0,26**</b> | <b>0,06</b>     | 0,38** | 0,43** | 0,35** | 0,10** | 0,28** | 0,38** | 0,36** | 0,59** |        |        |        |
| 10. Hospital management support for patient safety                 | 3               | <b>0,58**</b> | <b>-0,03</b>    | 0,38** | 0,55** | 0,40** | 0,47** | 0,61** | 0,39** | 0,36** | 0,49** | 0,29** |        |        |
| 11. Teamwork across hospital units                                 | 4               | <b>0,43**</b> | <b>0,00</b>     | 0,40** | 0,43** | 0,38** | 0,32** | 0,46** | 0,33** | 0,32** | 0,42** | 0,31** | 0,54** |        |
| 12. Hospital handoffs and transitions                              | 4               | <b>0,37**</b> | <b>0,03</b>     | 0,32** | 0,33** | 0,31** | 0,25** | 0,36** | 0,29** | 0,25** | 0,36** | 0,35** | 0,41** | 0,60** |
| <b>B. new 8-factor model</b>                                       |                 |               |                 | 01     | 02     | 03     | 04     | 05     | 06     | 07     | 08     | 09     | 10     | 11     |
|                                                                    | Number of items | E1            | G1 <sup>+</sup> |        |        |        |        |        |        |        |        |        |        |        |
| E1. Patient safety grade                                           | 1               |               |                 |        |        |        |        |        |        |        |        |        |        |        |
| G1: Number of events reported                                      | 1               | <b>-0,04</b>  |                 |        |        |        |        |        |        |        |        |        |        |        |
| 01. Teamwork within units                                          | 3               | <b>0,28**</b> | <b>0,09**</b>   |        |        |        |        |        |        |        |        |        |        |        |
| 02. Organizational learning [D]                                    | -               | -             | -               | -      |        |        |        |        |        |        |        |        |        |        |
| 03. Nonpunitive response to error                                  | 3               | <b>0,41**</b> | <b>-0,05</b>    | 0,30** | -      |        |        |        |        |        |        |        |        |        |
| 04. Staffing                                                       | 4               | <b>0,54**</b> | <b>-0,09**</b>  | 0,24** | -      | 0,42** |        |        |        |        |        |        |        |        |
| 05. Overall perceptions of safety [D]                              | -               | -             | -               | -      | -      | -      |        |        |        |        |        |        |        |        |
| 06. Supervisor/manager expectations/actions                        | 3               | <b>0,40**</b> | <b>0,01</b>     | 0,30** | -      | 0,34** | 0,31** | -      |        |        |        |        |        |        |
| 07. Frequency of event reporting                                   | 3               | <b>0,34**</b> | <b>0,14**</b>   | 0,20** | -      | 0,18** | 0,19** | -      | 0,29** |        |        |        |        |        |
| 08. Feedback and communication about error                         | 4               | <b>0,41**</b> | <b>0,03</b>     | 0,38** | -      | 0,33** | 0,24** | -      | 0,52** | 0,50** |        |        |        |        |
| 09. Communication openness [D]                                     | -               | -             | -               | -      | -      | -      | -      | -      | -      | -      |        |        |        |        |
| 10. Hospital management support for patient safety                 | 3               | <b>0,58**</b> | <b>-0,03</b>    | 0,32** | -      | 0,40** | 0,51** | -      | 0,38** | 0,36** | 0,47** | -      |        |        |
| 11. Teamwork across hospital units                                 | 5               | <b>0,42**</b> | <b>0,00</b>     | 0,36** | -      | 0,40** | 0,37** | -      | 0,31** | 0,31** | 0,40** | -      | 0,54** |        |
| 12. Hospital handoffs and transitions [D]                          | -               | -             | -               | -      | -      | -      | -      | -      | -      | -      | -      | -      | -      | -      |
| n=974, except for G1.                                              |                 |               |                 |        |        |        |        |        |        |        |        |        |        |        |
| <sup>+</sup> n=952 for the variable G1: Number of Events Reported. |                 |               |                 |        |        |        |        |        |        |        |        |        |        |        |
| *P < 0.05; **P < 0.01.                                             |                 |               |                 |        |        |        |        |        |        |        |        |        |        |        |
| [D] Dimension is removed from the model (colored in dark gray).    |                 |               |                 |        |        |        |        |        |        |        |        |        |        |        |
